1 **Group size influences individual metabolic traits in a social fish**

2 Emmanuelle Chrétien<sup>1,4</sup>, Daniel Boisclair<sup>1,4</sup>, Steven J. Cooke<sup>2</sup>, and Shaun S. Killen<sup>3,4</sup>

3

4 <sup>1</sup> Université de Montréal, Département de sciences biologiques, Campus MIL, 1375 Av. Thérèse-  
5 Lavoie-Roux, Montréal, QC, Canada H2V 0B3

6 <sup>2</sup>Fish Ecology and Conservation Physiology Laboratory, Department of Biology and Institute of  
7 Environmental and Interdisciplinary Science, Carleton University, 1125 Colonel By Drive,  
8 Ottawa, ON, Canada K1S 5B6

9 <sup>3</sup>Institute of Biodiversity, Animal Health and Comparative Medicine, College of Medical,  
10 Veterinary and Life Sciences, Graham Kerr Building, University of Glasgow, Glasgow, UK G12  
11 8QQ

12 <sup>4</sup>Groupe interuniversitaire en limnologie et environnement aquatique (GRIL), Département de  
13 sciences biologiques, Campus MIL, 1375 Av. Thérèse-Lavoie-Roux, Montréal, QC, Canada H2V  
14 0B3

15

16 **\* Correspondence to:**

17 Emmanuelle Chrétien

18 [emmanuelle.chretien@umontreal.ca](mailto:emmanuelle.chretien@umontreal.ca)

19 Université de Montréal

20 Campus MIL, 1375 Av. Thérèse-Lavoie-Roux, Montréal, QC, Canada H2V 0B3

21

22 **Abstract**

23 1. Group living is widespread among animal species and yields both costs and benefits.

24 Presence of conspecifics can restrict or enhance the expression of individual behaviour, and  
25 the recent social environment is thought to affect behavioural responses in later contexts,  
26 even when individuals are alone. However, little is known about how social dynamics  
27 influence the expression of individual physiological traits, including metabolic rates.

28 2. There is some evidence that shoaling can reduce fish metabolic rates, but habitat conditions  
29 such as shelter availability may generate density-dependent influences on individual  
30 metabolic rates.

31 3. We investigated how social group size and availability of shelter influence Eurasian minnow  
32 *Phoxinus phoxinus* metabolic rates estimated by respirometry in the presence or absence of  
33 plant shelter. Respirometry trials were conducted before and after we housed fish for three  
34 weeks in a social treatment consisting in a specific group size (n= 4 or 8) and shelter  
35 availability (presence or absence of plant shelter in the holding tank).

36 4. Minimum day-time and night-time metabolic rates estimated while in presence of plant  
37 shelter were lower than when estimated in absence of plant shelter, both before and after  
38 individuals were housed in their social group size and shelter availability treatment. Standard  
39 metabolic rate was higher for fish held in groups of four as compared to fish held in groups  
40 of eight while maximum metabolic rate showed no difference. Shelter availability during the  
41 social treatments did not influence standard or maximum metabolic rates.

42 5. Our results suggest that group size may directly influence energy demands of individuals,  
43 highlighting the importance of understanding the role of social dynamics on variations in  
44 physiological traits associated with energy expenditure.

45 **Key words:** density, maximum metabolic rate, shelter, social group, standard metabolic rate

## 46 **Introduction**

47           An animal social group is any set of individuals that remain together in space and time  
48 (Krause & Ruxton, 2002). Group living can provide a number of benefits, such as reduced  
49 predation risk, improved foraging, increased mate choice, and reduced energetic cost of  
50 movement or thermoregulation (Evans et al., 2016; Jolles et al., 2020; Krause & Ruxton, 2002).  
51 Conversely, group living can be associated with increased conspicuousness or attack rates from  
52 predators, reduced individual growth if food resources are limited, and increased parasite or  
53 disease burden (Altizer et al., 2003; Guénard et al., 2012; Hoare et al., 2004). Social structures  
54 emerge in groups from variability in individual behaviour and interactions among groupmates.  
55 Some behavioural responses are influenced by the number of groupmates present (Krause &  
56 Ruxton, 2002). For example, group size has been negatively correlated with foraging in novel  
57 contexts (Day et al., 2001) but positively correlated with exploration (Ward, 2012). Presence of  
58 conspecifics can restrict or enhance the expression of individual behaviour through processes like  
59 conformity or facilitation (Jolles et al., 2016; Ward, 2012; Ward & Webster, 2016).  
60 Consequently, individuals may express a different suite of behaviours and different degrees of  
61 their full behavioural capacity while in group compared to when they are alone (Jolles et al.  
62 2020). Further, there is some evidence that the recent social environment can affect behavioural  
63 responses in later contexts, even when individuals are alone (Jolles et al. 2016). This suggests  
64 that the social environment could modulate an individual's behavioural expression or capacity,  
65 yet the ways in which the phenotype of individual animals interact with their social environment  
66 remains largely unknown, including how social dynamics affect individual physiological traits.

67           The interplay between the social environment and individual physiological traits may be  
68 especially complex due to the effects of social dynamics on individuals stress, energy intake, and  
69 energy use (Webster & Ward, 2011). For instance, standard metabolic rate (SMR), the minimum

70 rate of energy use needed to sustain life at a given temperature in an ectotherm (Burton et al.,  
71 2011; Chabot et al., 2016), generally correlates with dominance, aggression, and tendency to take  
72 risks among individuals (Arnold et al., 2021; Biro & Stamps, 2010; Metcalfe et al., 2016;  
73 Redpath et al. 2010). However, there is also evidence that individual stress can influence SMR  
74 over various temporal scales. In brown trout *Salmo trutta*, holding in pairs led to an increase in  
75 SMR of subordinate individuals, probably due to social stress, while SMR of dominant  
76 individuals did not change (Sloman et al., 2000). This is an example of how dominance can  
77 modulate relationships between metabolism and behaviour (Killen et al., 2013), though whether  
78 such effects occur in larger or more complex social systems than dyads requires further  
79 investigation. There is evidence, however, that shoaling can reduce SMR in fish through  
80 “calming effects” (Nadler et al., 2016). Like SMR, maximum metabolic rate (MMR) and aerobic  
81 scope (AS; the difference between MMR and SMR) can correlate with dominance (Killen et al.,  
82 2014), boldness, or aggression (Redpath et al. 2010). However, to our knowledge, there is no  
83 evidence to date that social stress can influence MMR or AS (Killen, Croft, et al., 2016), despite  
84 their potential to constrain energetically costly behaviours and other aerobically fueled activities  
85 (Metcalfe et al., 2016). In any case, SMR and MMR are often positively correlated (Auer et al.  
86 2017; Killen, Glazier, et al., 2016; Norin & Clark, 2016) within and across species. As such, any  
87 effects of social dynamics on metabolic rates at rest may also affect aerobic capacity, or vice  
88 versa. The potential for social dynamics to influence either SMR or MMR could be reflected in  
89 AS, and thus influence the capacity to perform aerobically fueled activities. Yet, few studies have  
90 investigated how group living affects interactions between behavioural and physiological traits  
91 (Huang et al., 2020), aside from studies looking at effects of dominance in dyads (Sloman et al.,  
92 2000).

93           Habitat may further modulate interactions between individual traits and social dynamics  
94 (Jolles et al., 2020). Habitat conditions such as temperature or oxygen concentration influence  
95 metabolic rates, which in turn may affect performance among individuals within groups  
96 (Claireaux & Lefrançois, 2007; Fry, 1971; Horodysky et al., 2015; Huey, 1991). Conversely,  
97 social stress can reduce tolerance to thermal stress (LeBlanc et al., 2011) and hypoxia (Thomas &  
98 Gilmour, 2012). Other habitat conditions such as food and shelter availability may exert density-  
99 dependent influences on relationships between metabolism and behaviour. A number of studies  
100 have revealed that SMR or RMR estimated while in presence of shelter were reduced compared  
101 to when shelter was absent, probably due to decreased stress or reduction of alertness or vigilance  
102 when individuals are visually hidden (Chrétien et al., 2020; Finstad et al., 2004; Fischer, 2000;  
103 Millidine et al., 2006; Norin et al., 2018). However, little is known about the effects of long-term  
104 shelter availability on individual metabolic rates and interactions with an animal's social  
105 environment. Increased competition for a limited resource, like availability of shelter, could  
106 strengthen social hierarchies and increase stress experienced by subordinates, and these effects  
107 could be greater in larger social groups. As such, group size and long-term shelter availability  
108 may have interacting effects that carry over and influence individual metabolic rates.

109           We investigated whether exposure to a given group size and shelter availability could  
110 influence metabolic rates of Eurasian minnows *Phoxinus phoxinus*, a small Cyprinid naturally  
111 living in social groups (Magurran, 1986). We held fish in groups of four or eight, in tanks with or  
112 without plant shelter. The combination of group size and shelter availability in holding tanks  
113 generated social treatments that differed in fish density and potential competition intensity for use  
114 of shelter. Respirometry trials were conducted before and after fish were housed for three weeks  
115 in these different social treatments, to measure metabolic rates ( $\dot{M}O_2$ ) in presence or in absence of  
116 plant shelter. This design allowed us to get estimates of day-time and night-time  $\dot{M}O_{2min}$  in

117 presence or in absence of plant shelter, as the importance of being visually hidden by a shelter  
118 may vary with light intensity, as well as estimates of SMR, MMR, and AS. We hypothesized that  
119 the recent social environment would have metabolic costs that carry over, even when individuals  
120 are alone (Jolles et al., 2016), and be reflected in estimates of metabolic rates. Consequently, we  
121 predicted that presence of plant shelter during respirometry trials would lower day-time  $\dot{M}O_{2min}$ ,  
122 but that the magnitude of this effect would be smaller after the fish were held for three weeks in  
123 their social treatment (Killen et al., 2013). Given that minnows are social fish, we also predicted  
124 that SMR would vary with group size, due to the potential for social dynamics to modulate SMR  
125 (Sloman et al., 2000). We also predicted that fish held without access to plant shelter would have  
126 higher SMR, due to chronic effects of stress (Huey, 1991). The potential for group size and  
127 shelter availability to influence MMR is unclear. On the one hand, MMR is generally thought to  
128 be less plastic than SMR (Norin & Metcalfe, 2019), but on the other hand, SMR and MMR are  
129 thought to be positively correlated (Killen, Glazier, et al., 2016; Norin & Clark, 2016). We  
130 nonetheless expected to see changes in AS due to predicted changes in SMR.

131

## 132 **Materials and Methods**

### 133 *Experimental animals*

134 Juvenile Eurasian minnows (*Phoxinus phoxinus* Linnaeus) were captured in spring 2018  
135 from River Kelvin (55.86667, -4.31667; Glasgow, United Kingdom) using dip-nets. The  
136 sampling location was an artificial side channel along the River Kelvin where small minnows are  
137 trapped as they pass over a weir and are unable to return to the main river. Fish were transported  
138 to the nearby University of Glasgow aquarium facilities and held at 15 °C in two large stock tanks  
139 (100 x 40 x 30 cm) each filled with 100-150 individuals (density = 833 to 1250 fish m<sup>-3</sup>) for 11  
140 months before the study, which took place in April and May 2019. During this holding period,

141 fish were fed *ad libitum* a combination of pellets and blood worms and were on a 12 h light: 12 h  
142 dark photoperiod.

143

#### 144 *Experimental design*

145 Experiments were conducted on a total of 80 fish. Since the capacity of the respirometry  
146 set-up was of 16 fish (each such group is hereafter referred to as a “lot”), five lots were subjected  
147 to respirometry before and after exposure to the social treatments (combination of group size and  
148 shelter availability). Each experiment consisted of an initial respirometry trial, a 3-week holding  
149 in a social treatment, and a final respirometry trial (Fig. 1). A group of 16 minnows were  
150 haphazardly picked from the two stock tanks 48 hours before the onset of an experiment, isolated  
151 in a rearing tank (40 x 40 x 30 cm), and fasted.

152 Each respirometry trial was conducted to estimate fish metabolic rates in the presence or  
153 absence of artificial plant shelter. Fish were placed in individual glass chambers (~100 ml)  
154 separated by opaque white dividers to prevent fish from seeing each other. Respirometry trials  
155 lasted ~45h during which chambers were covered with artificial plant shelter for approximately  
156 half of the trial duration (Fig. S1). At the end of the initial respirometry trial, fish were weighed,  
157 measured and injected with a unique combination of visible implant elastomer (Northwest  
158 Marine Technology, Anacortes, WA, USA) in the dorsal body surface to allow individual  
159 identification. The 16 fish within a given lot were afterwards allotted in groups of four or eight  
160 fish and placed in experimental tanks (40 x 40 x 30 cm) containing artificial plant shelter or not,  
161 thus forming different social treatments. After the three week holding in their social treatment,  
162 the 16 fish were weighted and measured again, and the final respirometry trial was conducted.  
163 The whole experiment, from the beginning of the initial respirometry trial with the first lot to the  
164 end of the final respirometry trial with the last lot, lasted 41 days.

165 In total, there were 14 experimental holding tanks. In eight of these experimental tanks,  
166 the social treatment was defined by a group size of four fish (density = 83 fish m<sup>-3</sup>) either with, or  
167 without, artificial plant shelter (four experimental tanks each). In the remaining six experimental  
168 tanks, the social treatment was defined by a group size of eight fish (density = 166 fish m<sup>-3</sup>) either  
169 with, or without, artificial plant shelter (three experimental tanks each).

170 Fish were fed *ad libitum* a combination of pellets and blood worms in their experimental  
171 holding tank during the 3-week social experiment to minimize potential effects of density on  
172 individual food intake and growth. Daily specific growth rate (SGR: in % day<sup>-1</sup>) during the 3-  
173 week social experiment was calculated for each individual using the following equation:

$$174 \quad SGR = \frac{[\log(M_f) - \log(M_i)]}{t} \times 100 \quad (\text{eq.1})$$

175 where  $M_f$  is the observed mass at the time of the final respirometry trial,  $M_i$  is the observed mass  
176 at the time of the initial respirometry trial, and  $t$  is the number of growth days. Over the 3-week  
177 social experiment, SGR was higher for fish held in groups of four (mean  $\pm$  standard deviation:  
178  $0.64 \pm 0.27$  % day<sup>-1</sup>, from -0.07 to 0.99% day<sup>-1</sup>, Fig. S2) than for fish held in groups of eight  
179 ( $0.50 \pm 0.19$  % day<sup>-1</sup>, from 0.09 to 0.99% day<sup>-1</sup>), and this difference was significant ( $p=0.004$ ,  
180  $R^2_{\text{adj}} = 0.084$ ). No relationship was found between SGR and metabolic rates measured at the final  
181 experiment (see Supplementary Information for details: Tables S1-S2, Fig. S2-S3).

182

### 183 *Respirometry trials*

184 Metabolic rates were estimated using oxygen consumption rates ( $\dot{M}O_2$ : mg O<sub>2</sub> hr<sup>-1</sup>;  
185 Svendsen et al., 2016), determined via intermittent flow-through respirometry equipment and  
186 software (Firesting, PyroScience, Aachen, Germany). Water was continuously circulated through  
187 each chamber with a peristaltic pump and gas impermeable tubing. Automated flush pumps



188 refreshed the chambers with UV-treated and oxygenated water for 2 min of every 7-min cycle.  
189 Dissolved oxygen concentrations were maintained above 80% air saturation at all times with air-  
190 bubblers. Temperature was measured with a Pt100 temperature probe and maintained at 15 °C  
191 with a TMP-REG instrument (Loligo Systems, Tjele, Denmark) by recirculation of water through  
192 a stainless coil in a cold bath.

193         Respirometry trials lasted ~45h (43.8 to 46.1h), and chambers were covered with artificial  
194 plants for about half of its duration ( $\sim 21.5 \pm 2$  hours; Fig. 2). Presence of artificial plant shelter  
195 was randomly set to occur during the first or the second half of the initial respirometry trial, and  
196 order was reversed for the final respirometry trial. Respirometry trials started mid-afternoon, and  
197 condition (with or without artificial plant shelter) was changed at around noon the next day (~21h  
198 after the onset of the respirometry trial). Approximately 43h after the onset of the respirometry  
199 trial, fish were taken out of their chamber one by one for a 2-min chase protocol (Roche et al.,  
200 2013) and returned in their chamber for immediate measurement of  $\dot{M}O_2$  to estimate their  
201 maximum metabolic rate MMR (Fig. 2). Respirometry resumed for another hour, and fish were  
202 removed from the chambers and transferred to their original experimental tank. Background  
203 oxygen consumption in each empty chamber was recorded over three 7-min cycles at the start  
204 and end of each respirometry trial.

205

#### 206 *Calculation of metabolic rates*

207         Metabolic rates were calculated by multiplying the slopes of decline in oxygen  
208 concentration in the chamber during closed measurement cycles, excluding the first 30 seconds,  
209 by the volume of the chamber (corrected for the volume of fish, assuming a density of 1 kg l<sup>-1</sup>)  
210 using the package *FishResp* in R (Morozov et al., 2019; R Foundation for Statistical Computing,

211 2018). Background oxygen consumption was subtracted from  $\dot{M}O_2$  measurements, assuming a  
212 linear change between measures taken at the start and end of each trial. Day-time and night-time  
213 minimum metabolic rates ( $\dot{M}O_{2\min}$ ; mg O<sub>2</sub> kg<sup>-1</sup> hr<sup>-1</sup>) were calculated separately to account for the  
214 potentially different effect of the presence of shelter during day-time and night-time.  $\dot{M}O_{2\min}$   
215 were estimated using the 0.2 quantile of the  $\dot{M}O_2$  data with the package *fishMO2* in R (Chabot et  
216 al., 2016; Chabot, 2016). The range of data used for the calculation of night-time  $\dot{M}O_{2\min}$  started  
217 5 hours after fish were put in the chamber (at around 9:30 pm) or 5 hours after the change in  
218 condition (presence of plant shelter or not; at around 6:30 pm), and ended in the morning at 7:00  
219 am, moment at which lights were turned on. The range of data used for the calculation of day-  
220 time  $\dot{M}O_{2\min}$  started at 7:00 am and ended at the change in condition, or when fish were retrieved  
221 from the chamber for the chase protocol (Fig. 2). Standard metabolic rate (SMR; mg O<sub>2</sub> kg<sup>-1</sup> hr<sup>-1</sup>)  
222 was set as the lowest estimate of day-time or night-time  $\dot{M}O_{2\min}$  over a trial. MMR (mg O<sub>2</sub> kg<sup>-1</sup>  
223 hr<sup>-1</sup>) was estimated as the highest rate of oxygen consumption over 3 a minute rolling average  
224 regression within a measurement cycle following the chase protocol. Aerobic scope (AS; mg O<sub>2</sub>  
225 kg<sup>-1</sup> hr<sup>-1</sup>) was calculated as the difference between MMR and SMR. All metabolic rates were  
226 adjusted to the mean body mass of the fish in our sample (mean ± s.d.: 1.95 ± 0.57 g) using the  
227 slope *b* of the log-log relationship between  $\dot{M}O_2$  and mass (Steffensen et al., 1994; Ultsch, 1995).

228

$$229 \quad \dot{M}O_{2\text{adj}} = (\text{mean fish mass})^{b-1} \times (\text{individual fish mass})^{1-b} \times \text{individual fish } \dot{M}O_2 \quad (\text{eq.2})$$

230

### 231 *Statistical analyses*

232 All data are available from Zenodo (<https://doi.org/10.5281/zenodo.4705121>, Chrétien et  
233 al., 2021). All analyses were computed in R v. 3. 6. 0 (R Foundation for Statistical Computing,

234 2018). Effects of presence of shelter on night-time and day-time  $\dot{M}O_{2\min}$  measured during initial  
235 and final respirometry trials were tested using linear mixed effects models (LMM) with the  
236 package *lme4* (Bates et al., 2014). Full models included trial (initial or final), trial day (1<sup>st</sup> or 2<sup>nd</sup>),  
237 presence or absence of plant shelter during the trial, fish body mass (g), and all interactions as  
238 fixed effects. There was no relationship between fish body mass (g) and mass-adjusted metabolic  
239 rates, so fish body mass was excluded from models. Models included fish ID, lot number (1 to 5),  
240 and tank (referring to the experimental tank in which fish were held during the social treatment)  
241 as potential random effects. The best random structure was first selected by comparison of  
242 Akaike information criterion on full models (AIC; Zuur et al., 2009), then the fixed structure was  
243 simplified by removal of non-significant interactions. Final models included fish ID and lot  
244 number as random effects in a nested structure (lot number/fish ID). Model assumptions were  
245 met when response variables were log-transformed. For all models, assumptions of  
246 homoscedasticity, linearity and normality were confirmed by visual inspection of residual plots.

247       Effects of group size and shelter availability on SMR, MMR, and AS were tested with  
248 LMM using data from the initial and final respirometry trials, social treatment conditions (group  
249 size: four or eight fish, shelter availability: presence or absence of artificial plant in experimental  
250 tank), fish body mass, and all interactions as fixed effects. Full models included fish ID, lot  
251 number, and tank as potential random effects, and best random structure was selected by  
252 comparison of AIC. Final SMR model included fish ID and lot number as random effects in a  
253 nested structure (lot number/fish ID). Only fish ID was retained as random effect in final MMR  
254 and AS models. Model assumptions were confirmed by visual inspection of residual plots.

255       Effect sizes were calculated using estimated marginal means from models obtained with  
256 the package *emmeans* (Lenth & Hervé, 2015). Marginal  $R^2$  ( $R^2_m$ : variance explained by fixed  
257 effects) and conditional  $R^2$  ( $R^2_c$ : variance explained by fixed and random effects) were calculated

258 from the models fitted through restricted maximum likelihood analysis (Bolker et al., 2009;  
259 Harrison et al., 2018). The difference between  $R^2_c$  and  $R^2_m$  for each model represent variability  
260 due to the random effects (Nakagawa & Schielzeth, 2013).

261

## 262 **Results**

### 263 *Presence of shelter and metabolic rates*

264       Respirometry timing (initial or final), trial day, and plant shelter (presence or absence  
265 during respirometry) had significant effects on night-time  $\dot{M}O_{2min}$  ( $p=0.002$ ,  $p<0.001$ , and  
266  $p=0.002$ , respectively; Table 1). Night-time  $\dot{M}O_{2min}$  recordings were on average 8.7% higher  
267 during the final respirometry trial, 16.2% lower on the 2<sup>nd</sup> day of trial, and 7.9% lower in the  
268 presence of plant shelter (Fig. 3A-B). Day-time  $\dot{M}O_{2min}$  was influenced by respirometry timing  
269 ( $p<0.001$ ; Table 1) and trial day ( $p=0.006$ ) but not by the presence of plant shelter ( $p=0.819$ ).  
270 Day-time  $\dot{M}O_{2min}$  was on average 26.9% higher at the final respirometry trial, and 5.8% lower on  
271 the 2<sup>nd</sup> day of trials (Fig. 3C-D). There was an interaction between trial day and plant shelter on  
272 day-time  $\dot{M}O_{2min}$  ( $p=0.044$ ): in the presence of plant shelter, day-time  $\dot{M}O_{2min}$  rates measured on  
273 the 2<sup>nd</sup> day were 10.0% lower than that those of the 1<sup>st</sup> day.

274

### 275 *Social environment and metabolic rates*

276       There was an overall increase in SMR after the 3-week social treatment ( $p<0.001$ ; Table  
277 2), and an interacting effect of trial and group size ( $p=0.006$ ). SMR estimates were 28% higher at  
278 the final respirometry trial compared to the initial one for fish held in groups of four, while SMR  
279 increased of 13% between the two trials for fish held in groups of eight (Fig. 4A-B). Plant shelter  
280 availability in experimental tanks did not influence SMR. MMR did not change between the  
281 initial and final respirometry trials ( $p=0.254$ ). Fish held in groups of four had, however, higher

282 MMR than fish held in groups of eight ( $p=0.005$ ; Fig. 4C-D). Finally, there was an overall  
283 reduction in AS after the 3-week social treatment ( $p=0.029$ ; Table 2). Group size also negatively  
284 influenced AS ( $p=0.008$ ; Fig. 4E-F). Plant shelter availability in experiment tanks did not  
285 influence MMR or AS (Table 2).

286

## 287 **Discussion**

288         The main goal of this study was to assess whether exposure to a given social group size  
289 and level of shelter availability had the potential to modulate expression of metabolic traits. Both  
290 before and after holding in different social treatments, minimum metabolic rates measured in  
291 presence of shelter were lower than those measured in absence of shelter. Presence of plant  
292 shelter during respirometry trials reduced metabolic rates regardless of the social group size and  
293 shelter availability fish were exposed to. We did, however, observe an overall increase in the  
294 SMR of Eurasian minnows between the initial and final respirometry trial, with the increase in  
295 SMR throughout the study being two-fold higher for fish held in groups of four as compared to  
296 that of fish held in groups of eight. Availability of shelter in holding tanks during the social  
297 treatments did not affect metabolic rates. Our results suggest that group size has metabolic costs  
298 that carry over, even when fish are at rest and in isolation, such as during respirometry trials. This  
299 means that group size can have a modulating effect on levels of baseline metabolism, which  
300 could in turn have implications on an animal's energy budget, including growth, reproductive  
301 investment, and overall performance capacity. In the current study, the presence of more  
302 groupmates was associated with lower metabolic rate, suggesting that a reduction in energy  
303 demand may be an additional benefit of living in larger social groups.

304

305 *Presence of shelter and metabolic rates*

306            Presence of plant shelter during respirometry lowered estimates of metabolic rates both  
307 before and after exposure to the social treatments. Presence of shelter has been associated with  
308 lower metabolic rates in some species (Finstad et al., 2004; Fischer, 2000; Millidine et al., 2006;  
309 Norin et al., 2018) but not in others (Fischer, 2000; Kegler et al., 2013), or to mixed results  
310 (Chrétien et al. 2020). Using shelter can reduce the occurrence of otherwise energetically  
311 demanding activities, such as those associated with maintaining vigilance against predators (Lind  
312 & Cresswell, 2005; Millidine et al., 2006). It was surprising that the effect of shelter was stronger  
313 for night-time than for day-time  $\dot{M}O_{2min}$ , assuming the main reason for sheltering is to remain  
314 visually hidden. This pattern was nonetheless observed in another study, where an effect of  
315 shelter presence was observed during the night but not during the day (Norin et al., 2018). It is  
316 possible that fish showed higher levels of spontaneous activity during day-time which might  
317 mask any effect of the shelter on  $\dot{M}O_{2min}$ , although no consistent relationship has been observed  
318 between activity and light intensity in our study species (Jones, 1956). Another potential  
319 explanation is that fish had time to acclimate to the presence of shelter before night-time, and  
320 therefore had expected that they could be sheltered at night. We predicted that the magnitude of  
321 the effect of shelter on metabolic rates would be smaller after the 3-week social experiment. This  
322 trend was not observed, suggesting that individuals did not adjust their metabolic response to  
323 immediate shelter presence, regardless of the group size or level of shelter availability they  
324 received during the experiment. This indicates that shelter availability has a consistent and robust  
325 lowering effect on resting metabolic rates in Eurasian minnow and likely other species with  
326 similar social systems and patterns of habitat use.

327

328 *Social environment and metabolic rates*

329           There was an overall increase in estimates of SMR throughout the study, after fish had  
330 been exposed to the social treatments. Importantly, group size affected the strength of the  
331 increase: fish held in groups of four showed a two-fold higher increase in estimated SMR than  
332 fish held in groups of eight. We cannot rule out that conditions may have been more favorable for  
333 growth in tanks with groups of four, even if food was not a limited resource in any social  
334 treatment. However, there was no relationship between final SMR and SGR, nor was there an  
335 interaction between SGR and social treatment conditions (Tables S1-S2, Fig. S2-S3), suggesting  
336 other mechanisms are more likely to explain the differences observed. For instance, fish in  
337 groups of four potentially had more volume available for individual exploration and an increased  
338 need for individual vigilance, potentially increasing the cognitive load and associated metabolic  
339 costs that may carry over, even when the fish are at rest, during respirometry for estimates of  
340 SMR (Moss et al., 1998). Prolonged changes in locomotor activity level due to social interaction  
341 or vigilance may induce changes in muscle enzyme levels and mitochondria density, and thus  
342 affect fish minimum energy demand (Killen, Glazier, et al., 2016). Intensity of competition and  
343 strength of hierarchy structures could also vary differently with group sizes. With increasing  
344 group size, competition for limited resources like shelter may increase but dominance hierarchies  
345 tend to weaken, as the cost of interacting with multiple individuals may become too high (Sloman  
346 & Armstrong, 2002). For example, Pottinger and Pickering (1992) observed that social  
347 hierarchies emerged in rainbow trout *Oncorhynchus mykiss* held for six weeks in pairs or in  
348 groups of 5, but not in groups of 10 fish. An increase in aggressive behaviour such as pecking  
349 incurs increased activity and metabolic costs (Marchand & Boisclair, 1998). Presence of plant  
350 shelter in experimental tanks did not affect SMR. This was surprising given that tank  
351 enhancements such as artificial plants can be used as tools to reduce aggression and provide  
352 shelter in captivity (Näslund & Johnsson, 2016). It is possible that plant shelter in the

353 experimental tanks were rather considered as a limited resource to compete for, which could have  
354 enhanced social stress. Sustained stress in social groups with stronger dominance hierarchies  
355 could carry over and limit our ability to effectively estimate SMR (Killen et al., 2014; Metcalfe et  
356 al., 2016; Sloman et al., 2000). Additional research on the effects of social dynamics on fish  
357 cognitive abilities or stress indicators could shed light on the mechanisms underlying the results  
358 observed here.

359 Fish held in groups of four had significantly higher MMR and AS than fish held in group  
360 of eight before the 3-week holding in their social treatment (Table 2). We did not expect group  
361 size to affect metabolic rates in the initial respirometry trial as fish were all held in the same high-  
362 density stock tank beforehand. It therefore appears that this result was driven by a single lot of  
363 fish. The first lot of 16 fish subjected to our experiment reached overall higher MMR (and AS)  
364 than the other lots at the initial respirometry trial (Fig. S4), and were all allotted in groups of four.  
365 We included “lot number” as a potential random effect in all our models to account for higher  
366 similarities in fish from the same lot compared to other fish. Lot number was retained in a nested  
367 structure with fish ID for night-time  $\dot{M}O_{2min}$ , day-time  $\dot{M}O_{2min}$  and SMR models. It was not,  
368 however, kept in models on MMR or AS, because its inclusion resulted in singular fits  
369 (Matuschek et al., 2017): no variance was associated to the random effect “lot number”. In any  
370 case, models using either “fish ID” or “lot number /fishID” as a random component generated  
371 similar results (Table S3). High susceptibility to capture is a trait that can correlate with MMR  
372 (Redpath et al., 2010), and might explain the pattern we observed when comparing MMR of the  
373 first lot of fish captured to MMR of the subsequent ones. While this pattern could be interesting  
374 to investigate in other studies, we can only interpret it here as a measurement artefact and cannot  
375 link this result to the social treatments.



376           There is evidence that shoaling can have a “calming effect” and reduce metabolic rates of  
377 social fish species, through conspecific visual and olfactory cues (Nadler et al., 2016). The social  
378 treatment revealed that group size could influence SMR, which can be attributable to increased  
379 social stress at lower densities for these social fish. It is possible that increased group size and  
380 habitat complexity induces metabolic plasticity, which suggests that selection on energy  
381 expenditure in animals with strong social systems may be less likely to result in genetic change.  
382 Our results highlight the importance of understanding the role of social dynamics on variations in  
383 individual metabolic traits and thus on the physiological consequences of habitat conditions.

384

385 **Acknowledgements:**

386 We would like to thank the fish care team at the Graham Kerr building facilities for their help in  
387 maintaining fish throughout the study. The procedures described in this paper comply with animal  
388 care guidelines approved within the UK and were carried out under Home Office Project License  
389 no. PB948DAA0. This work was supported by grants from Natural Sciences and Engineering  
390 Research Council of Canada (NSERC, CGS-D to E.C. and Discovery Grant to D.B.), Fonds de  
391 recherche du Québec – Nature et Technologies (FRQNT, to E.C.), and Groupe de recherche en  
392 limnologie et environnement aquatique (GRIL, to E.C.). SSK was supported by a Starting Grant  
393 from the European Research Council starting (grant 640004) and a Natural Environment Research  
394 Council Advanced Fellowship (NE/J019100/1).

395

396 **Author’s contributions:**

397 E.C. and S. S. K. designed the experiments. E.C. performed the experiments, analyzed the data  
398 and led the writing of the manuscript. All authors contributed to the interpretation of data, the  
399 critical revision of the drafts and gave final approval for publication.

400  
401 **Data availability statement:** The datasets generated and analyzed during the current study are  
402 available from Zenodo repository <https://doi.org/10.5281/zenodo.4705121> (Chrétien et al., 2021).

403  
404 **References**

- 405 Altizer, S., Nunn, C. L., Thrall, P. H., Gittleman, J. L., Antonovics, J., Cunningham, A. A.,  
406 Dobson, A. P., Ezenwa, V., Jones, K. E., Pedersen, A. B., Poss, M., & Pulliam, J. R. C.  
407 (2003). Social organization and parasite risk in mammals: integrating theory and empirical  
408 studies. *Annual Review of Ecology, Evolution, and Systematics*, *34*, 517–547.  
409 <https://doi.org/10.1146/annurev.ecolsys.34.030102.151725>
- 410 Arnold, P. A., Delean, S., Cassey, P., & White, C. R. (2021). Meta-analysis reveals that resting  
411 metabolic rate is not consistently related to fitness and performance in animals. *Journal of*  
412 *Comparative Physiology B*. 00, 00-00. <https://doi.org/10.1007/s00360-021-01358-w>
- 413 Auer, S., Killen, S.S., & Rezende, E. (2017). Resting versus active: a meta-analysis of the intra-  
414 and inter-specific associations between minimum, sustained, and maximum metabolic rates  
415 in vertebrates. *Functional Ecology*, *31*, 1728–1738. [https://doi.org/10.1111/1365-](https://doi.org/10.1111/1365-2435.12879)  
416 [2435.12879](https://doi.org/10.1111/1365-2435.12879)
- 417 Bates, D., Maechler, M., Bolker, B., & Walker, S. (2014). lme4: Linear mixed-effects models  
418 using Eigen and S4.
- 419 Biro, P. A., & Stamps, J. A. (2010). Do consistent individual differences in metabolic rate  
420 promote consistent individual differences in behavior? *Trends in Ecology and Evolution*,  
421 *25(11)*, 653–659. <https://doi.org/10.1016/j.tree.2010.08.003>
- 422 Bolker, B. M., Brooks, M. E., Clark, C. J., Geange, S. W., Poulsen, J. R., Stevens, M. H. H., &  
423 White, J.-S. S. (2009). Generalized linear mixed models: a practical guide for ecology and

- 424 evolution. *Trends in Ecology and Evolution*, 24(3), 127–135.
- 425 <https://doi.org/10.1016/j.tree.2008.10.008>
- 426 Burton, T., Killen, S. S., Armstrong, J. D., & Metcalfe, N. B. (2011). What causes intraspecific  
427 variation in resting metabolic rate and what are its ecological consequences? *Proceedings*  
428 *of the Royal Society B: Biological Sciences*, 278(1724), 3465–3473.
- 429 <https://doi.org/10.1098/rspb.2011.1778>
- 430 Chabot, D., Steffensen, J. F., & Farrell, A. P. (2016). The determination of standard metabolic  
431 rate in fishes. *Journal of Fish Biology*, 88(1), 81–121. <https://doi.org/10.1111/jfb.12845>
- 432 Chabot, Denis. (2016). fishMO2: Calculate and plot the standard metabolic rate (SMR), the  
433 critical oxygen level (O2crit) and the specific dynamic action (SDA) and related variables  
434 in fishes and crustaceans.
- 435 Chrétien, E., Boisclair, D., Cooke, S. J., & Killen, S. S. (2021). Data for Chretien et al. 2021  
436 Group size influences individual metabolic traits in a social fish. *Zenodo*,  
437 <https://doi.org/10.5281/zenodo.4705121>
- 438 Chrétien, E., Cooke, S. J., & Boisclair, D. (2020). Does shelter influence the metabolic traits of a  
439 teleost fish? *Journal of Fish Biology*, 00, 00-00. <https://doi.org/10.1111/jfb.14653>
- 440 Claireaux, G., & Lefrançois, C. (2007). Linking environmental variability and fish performance:  
441 integration through the concept of scope for activity. *Philosophical Transactions of the*  
442 *Royal Society B*, 362(1487), 2031–2041. <https://doi.org/10.1098/rstb.2007.2099>
- 443 Day, R. L., MacDonald, T., Brown, C., Laland, K. N., & Reader, S. M. (2001). Interactions  
444 between shoal size and conformity in guppy social foraging. *Animal Behaviour*, 62(5), 917-  
445 925. <https://doi.org/10.1006/anbe.2001.1820>
- 446 Evans, J. C., Votier, S. C., & Dall, S. R. X. (2016). Information use in colonial living. *Biological*  
447 *Reviews*, 91(3), 658–672. <https://doi.org/10.1111/brv.12188>

- 448 Finstad, A. G., Forseth, T., Næsje, T. F., & Ugedal, O. (2004). The importance of ice cover for  
449 energy turnover in juvenile Atlantic salmon. *Journal of Animal Ecology*, *73*(5), 959–966.  
450 <https://doi.org/10.1111/j.0021-8790.2004.00871.x>
- 451 Fischer, P. (2000). An experimental test of metabolic and behavioural responses of benthic fish  
452 species to different types of substrate. *Canadian Journal of Fisheries & Aquatic Sciences*,  
453 *57*(11), 2336–2344. <https://doi.org/10.1139/f00-211>
- 454 Fry, F. E. J. (1971). The effect of environmental factors on the physiology of fish. In W. S. Hoar  
455 & D. J. Randall (Eds.), *Fish Physiology* (pp. 1–98).
- 456 Guénard, G., Boisclair, D., Ugedal, O., Forseth, T., Fleming, I. A., & Jonsson, B. (2012). The  
457 bioenergetics of density-dependent growth in Arctic char (*Salvelinus alpinus*). *Canadian*  
458 *Journal of Fisheries & Aquatic Sciences*, *69*(10), 1651–1662.  
459 <https://doi.org/10.1139/F2012-093>
- 460 Harrison, X. A., Donaldson, L., Correa-Cano, M. E., Evans, J., Fisher, D. N., Goodwin, C. E. D.,  
461 Robinson, B. S., Hodgson, D. J., & Inger, R. (2018). A brief introduction to mixed effects  
462 modelling and multi-model inference in ecology. *PeerJ*, *6*(e4794), 1–32.  
463 <https://doi.org/10.7717/peerj.4794>
- 464 Hoare, D. J., Couzin, I. D., Godin, J. G. J., & Krause, J. (2004). Context-dependent group size  
465 choice in fish. *Animal Behaviour*, *67*(1), 155–164.  
466 <https://doi.org/10.1016/j.anbehav.2003.04.004>
- 467 Horodysky, A. Z., Cooke, S. J., & Brill, R. W. (2015). Physiology in the service of fisheries  
468 science: Why thinking mechanistically matters. *Reviews in Fish Biology and Fisheries*,  
469 *25*(3), 425–447. <https://doi.org/10.1007/s11160-015-9393-y>
- 470 Huang, Y., Fu, S., Cooke, S. J., & Xia, J. (2020). Is repeatability of metabolic rate influenced by  
471 social separation? A test with a teleost fish. *Biology Letters*, *16*(4).

- 472 <https://doi.org/10.1098/rsbl.2019.0825>
- 473 Huey, R. B. (1991). Physiological consequences of habitat selection. *The American Naturalist*,  
474 137, S91-S115. <https://doi.org/10.1086/285141>
- 475 Jolles, J. W., Aaron Taylor, B., Manica, A. (2016). Recent social conditions affect boldness  
476 repeatability in individual sticklebacks. *Animal Behaviour*, 112, 139-  
477 145. <http://dx.doi.org/10.1016/j.anbehav.2015.12.010>
- 478 Jolles, J. W., King, A. J., & Killen, S. S. (2020). The role of individual heterogeneity in collective  
479 animal behaviour. *Trends in Ecology and Evolution*, 35(3), 278–291.  
480 <https://doi.org/10.1016/j.tree.2019.11.001>
- 481 Jones, B. Y. F. R. H. (1956). The behaviour of minnows in relation to light intensity. *Journal of*  
482 *Experimental Biology*, 33(2), 271–281.
- 483 Kegler, P., Kunzmann, A., Bröhl, S., & Herbert, N. A. (2013). No evidence of shelter providing a  
484 metabolic advantage to the false clown anemonefish *Amphiprion ocellaris*. *Journal of Fish*  
485 *Biology*, 82(2), 708–713. <https://doi.org/10.1111/jfb.12013>
- 486 Killen, S. S., Croft, D. P., Salin, K., & Darden, S. K. (2016). Male sexually coercive behaviour  
487 drives increased swimming efficiency in female guppies. *Functional Ecology*, 30(4), 576–  
488 583. <https://doi.org/10.1111/1365-2435.12527>
- 489 Killen, S. S., Glazier, D. S., Rezende, E. L., Clark, T. D., Atkinson, D., Willener, A. S. T., &  
490 Halsey, L. G. (2016). Ecological influences and morphological correlates of resting and  
491 maximal metabolic rates across teleost fish species. *American Naturalist*, 187(5), 592–606.  
492 <https://doi.org/10.1086/685893>
- 493 Killen, S. S., Marras, S., Metcalfe, N. B., McKenzie, D. J., & Domenici, P. (2013).  
494 Environmental stressors alter relationships between physiology and behaviour. *Trends in*  
495 *Ecology and Evolution*, 28(11), 651–658. <https://doi.org/10.1016/j.tree.2013.05.005>

- 496 Killen, S. S., Mitchell, M. D., Rummer, J. L., Chivers, D. P., Ferrari, M. C. O., Meekan, M. G., &  
497 McCormick, M. I. (2014). Aerobic scope predicts dominance during early life in a tropical  
498 damselfish. *Functional Ecology*, *28*(6), 1367–1376. [https://doi.org/10.1111/1365-](https://doi.org/10.1111/1365-2435.12296)  
499 [2435.12296](https://doi.org/10.1111/1365-2435.12296)
- 500 Krause, J., & Ruxton, G. D. (2002). *Living in Groups*. Oxford University Press.
- 501 LeBlanc, S., Middleton, S., Gilmour, K. M., & Currie, S. (2011). Chronic social stress impairs  
502 thermal tolerance in the rainbow trout (*Oncorhynchus mykiss*). *Journal of Experimental*  
503 *Biology*, *214*(10), 1721–1731. <https://doi.org/10.1242/jeb.056135>
- 504 Lenth, R. V., & Hervé, M. (2015). *Ismeans: Least-Squares Means*.
- 505 Lind, J., & Cresswell, W. (2005). Determining the fitness consequences of antipredation  
506 behavior. *Behavioral Ecology*, *16*(5), 945–956. <https://doi.org/10.1093/beheco/ari075>
- 507 Magurran, A. E. (1986). The development of shoaling behaviour in the European minnow,  
508 *Phoxinus phoxinus*. *Journal of Fish Biology*, *29*, 159–169. [https://doi.org/10.1111/j.1095-](https://doi.org/10.1111/j.1095-8649.1986.tb05007.x)  
509 [8649.1986.tb05007.x](https://doi.org/10.1111/j.1095-8649.1986.tb05007.x)
- 510 Matuschek, H., Kliegl, R., Vasishth, S., Baayen, H., & Bates, D. (2017). Balancing Type I error  
511 and power in linear mixed models. *Journal of Memory and Language*, *94*, 305–315.  
512 <https://doi.org/10.1016/j.jml.2017.01.001>
- 513 Marchand, F., & Boisclair, D. (1998). Influence of fish density on the energy allocation pattern of  
514 juvenile brook trout (*Salvelinus fontinalis*). *Canadian Journal of Fisheries & Aquatic*  
515 *Sciences*, *55*(4), 796–805. <https://doi.org/10.1139/f97-301>
- 516 Metcalfe, N. B., Van Leeuwen, T. E., & Killen, S. S. (2016). Does individual variation in  
517 metabolic phenotype predict fish behaviour and performance? *Journal of Fish Biology*,  
518 *88*(1), 298–321. <https://doi.org/10.1111/jfb.12699>
- 519 Millidine, K. J., Armstrong, J. D., & Metcalfe, N. B. (2006). Presence of shelter reduces

- 520 maintenance metabolism of juvenile salmon. *Functional Ecology*, 20(5), 839–845.  
521 <https://doi.org/10.1111/j.1365-2435.2006.01166.x>
- 522 Morozov, S., Scott McCairns, R. J., & Merilä, J. (2019). FishResp: R package and GUI  
523 application for analysis of aquatic respirometry data. *Conservation Physiology*, 7(1), 1–13.  
524 <https://doi.org/10.1093/conphys/coz003>
- 525 Moss, M. C., Scholey, A. B., & Wesnes, K. (1998). Oxygen administration selectively enhances  
526 cognitive performance in healthy young adults: A placebo-controlled double-blind  
527 crossover study. *Psychopharmacology*, 138(1), 27–33.  
528 <https://doi.org/10.1007/s002130050641>
- 529 Nadler, L. E., Killen, S. S., McClure, E. C., Munday, P. L., & McCormick, M. I. (2016).  
530 Shoaling reduces metabolic rate in a gregarious coral reef fish species. *Journal of*  
531 *Experimental Biology*, 219(18), 2802–2805. <https://doi.org/10.1242/jeb.139493>
- 532 Nakagawa, S., & Schielzeth, H. (2013). A general and simple method for obtaining  $R^2$  from  
533 generalized linear mixed-effects models. *Methods in Ecology and Evolution*, 4(2), 133–  
534 142. <https://doi.org/10.1111/j.2041-210x.2012.00261.x>
- 535 Näslund, J., & Johnsson, J. I. (2016). Environmental enrichment for fish in captive environments:  
536 Effects of physical structures and substrates. *Fish and Fisheries*, 17, 1–30.  
537 <https://doi.org/10.1111/faf.12088>
- 538 Norin, T., & Clark, T. D. (2016). Measurement and relevance of maximum metabolic rate in  
539 fishes. *Journal of Fish Biology*, 88, 122–151. <https://doi.org/10.1111/jfb.12796>
- 540 Norin, Tommy, & Metcalfe, N. B. (2019). Ecological and evolutionary consequences of  
541 metabolic rate plasticity in response to environmental change. *Philosophical Transactions*  
542 *of the Royal Society B: Biological Sciences*, 374(1768), 1–9.  
543 <https://doi.org/10.1098/rstb.2018.0180>

- 544 Norin, Tommy, Mills, S. C., Crespel, A., Cortese, D., Killen, S. S., & Beldade, R. (2018).  
545 Anemone bleaching increases the metabolic demands of symbiont anemonefish.  
546 *Proceedings of the Royal Society B*, 285(1876), 7–12.  
547 <https://doi.org/10.1098/rspb.2018.0282>
- 548 Pottinger, T. G., & Pickering, A. D. (1992). The influence of social interaction on the acclimation  
549 of rainbow trout, *Oncorhynchus mykiss* (Walbaum) to chronic stress. *Journal of Fish*  
550 *Biology*, 41, 435–447. <https://doi.org/10.1108/14691930210448297>
- 551 R Foundation for Statistical Computing, R. (2018). R: A Language and Environment for  
552 Statistical Computing (R. D. C. Team, Ed.). R Foundation for Statistical Computing.
- 553 Redpath, T. D., Cooke, S. J., Suski, C. D., Arlinghaus, R., Couture, P., Wahl, D. H., & Philipp,  
554 D. P. (2010). The metabolic and biochemical basis of vulnerability to recreational angling  
555 after three generations of angling-induced selection in a teleost fish. *Canadian Journal of*  
556 *Fisheries & Aquatic Sciences*, 67(12), 1983–1992. <https://doi.org/10.1139/f10-120>
- 557 Roche, D. G., Binning, S. A., Bosiger, Y., Johansen, J. L., & Rummer, J. L. (2013). Finding the  
558 best estimates of metabolic rates in a coral reef fish. *Journal of Experimental Biology*, 216,  
559 2103–2110. <https://doi.org/10.1242/jeb.082925>
- 560 Sloman, K. A., & Armstrong, J. D. (2002). Physiological effects of dominance hierarchies:  
561 laboratory artefacts or natural phenomena? *Journal of Fish Biology*, 61(1), 1–23.  
562 <https://doi.org/10.1111/j.1095-8649.2002.tb01733.x>
- 563 Sloman, K. A., Motherwell, G., O'Connor, K. I., & Taylor, A. C. (2000). The effect of social  
564 stress on the standard metabolic rate (SMR) of brown trout, *Salmo trutta*. *Fish Physiology*  
565 *and Biochemistry*, 23(1), 49–53. <https://doi.org/10.1023/A:1007855100185>
- 566 Steffensen, J. F., Bushnell, P. G., & Schurmann, H. (1994). Oxygen consumption in four species  
567 of teleosts from Greenland: no evidence of metabolic cold adaptation. *Polar Biology*, 14(1),



- 568 49–54. <https://doi.org/10.1007/BF00240272>
- 569 Svendsen, M. B. S., Bushnell, P. G., & Steffensen, J. F. (2016). Design and setup of an  
570 intermittent-flow respirometry system for aquatic organisms. *Journal of Fish Biology*,  
571 *88(1)*, 26–50. <https://doi.org/10.1111/jfb.12797>
- 572 Thomas, J. B., & Gilmour, K. M. (2012). Low social status impairs hypoxia tolerance in rainbow  
573 trout (*Oncorhynchus mykiss*). *Journal of Comparative Physiology B*, *182(5)*, 651–662.  
574 <https://doi.org/10.1007/s00360-012-0648-9>
- 575 Ultsch, G. R. (1995). On adjusting metabolic rates for body size. *Florida Scientist*, *58(3)*, 270–  
576 273.
- 577 Ward, A. J. W. (2012). Social facilitation of exploration in mosquitofish (*Gambusia holbrooki*).  
578 *Behavioral Ecology and Sociobiology*, *66(2)*, 223–230. [https://doi.org/10.1007/s00265-011-](https://doi.org/10.1007/s00265-011-1270-7)  
579 [1270-7](https://doi.org/10.1007/s00265-011-1270-7)
- 580 Ward, A., & Webster, M. (2016). *Sociality: The behaviour of group-living animals*. Springer.
- 581 Webster, M. M., & Ward, A. J. W. (2011). Personality and social context. *Biological Reviews*,  
582 *86(4)*, 759–773. <https://doi.org/10.1111/j.1469-185X.2010.00169.x>
- 583 Zuur, A. F., Ieno, E. N., Walker, N., Saveliev, A. A., & Smith, G. M. (2009). *Mixed effects*  
584 *models and extensions in ecology with R*. Springer.

585 Table 1: Results of linear mixed models relating night-time and day-time minimum metabolic  
 586 rates ( $\dot{M}O_{2min}$ ) of Eurasian minnows to respirometry trial (initial or final), trial day, and presence  
 587 or absence of plant shelter.  $R^2_m$  is the marginal  $R^2$  (variance explained by the fixed effects) and  
 588  $R^2_c$  is the conditional  $R^2$  (total variance explained by the fixed and the random effects).

| Response variable                | Effect             | $\chi^2$ | p-value | $R^2_m$ | $R^2_c$ |
|----------------------------------|--------------------|----------|---------|---------|---------|
| log Night-time $\dot{M}O_{2min}$ | Trial              | 9.313    | 0.002   | 11.5    | 42.6    |
|                                  | Day                | 42.501   | <0.001  |         |         |
|                                  | Plant shelter      | 9.229    | 0.002   |         |         |
| log Day-time $\dot{M}O_{2min}$   | Trial              | 111.905  | <0.001  | 16.7    | 56.2    |
|                                  | Day                | 7.591    | 0.006   |         |         |
|                                  | Plant shelter      | 0.052    | 0.819   |         |         |
|                                  | Day* Plant shelter | 4.051    | 0.044   |         |         |

589

590

591 Table 2: Results of linear mixed model relating metabolic rates of Eurasian minnows to the  
 592 moment of the respirometry trials, and social treatment (group size and shelter availability). Fish  
 593 ID and lot number were included in the SMR model as random effects. Only fish ID was  
 594 included as a random effect for MMR and AS models.  $R^2_m$  is the marginal  $R^2$  (variance explained  
 595 by the fixed effects) and  $R^2_c$  is the conditional  $R^2$  (total variance explained by the fixed and the  
 596 random effects).

| Response variable | Effect               | $\chi^2$ | p-value | $R^2_m$ | $R^2_c$ |
|-------------------|----------------------|----------|---------|---------|---------|
| SMR               | Trial                | 54.646   | <0.001  | 19.6    | 54.7    |
|                   | Group size           | 0.469    | 0.494   |         |         |
|                   | Shelter availability | 0.009    | 0.925   |         |         |
|                   | Trial * Group size   | 7.567    | 0.006   |         |         |
| MMR               | Trial                | 1.302    | 0.254   | 6.3     | 24.6    |
|                   | Group size           | 7.795    | 0.005   |         |         |
|                   | Shelter availability | 0.226    | 0.636   |         |         |
| AS                | Trial                | 4.740    | 0.029   | 7.3     | 24.2    |
|                   | Group size           | 6.887    | 0.008   |         |         |
|                   | Shelter availability | 0.254    | 0.614   |         |         |

597

598

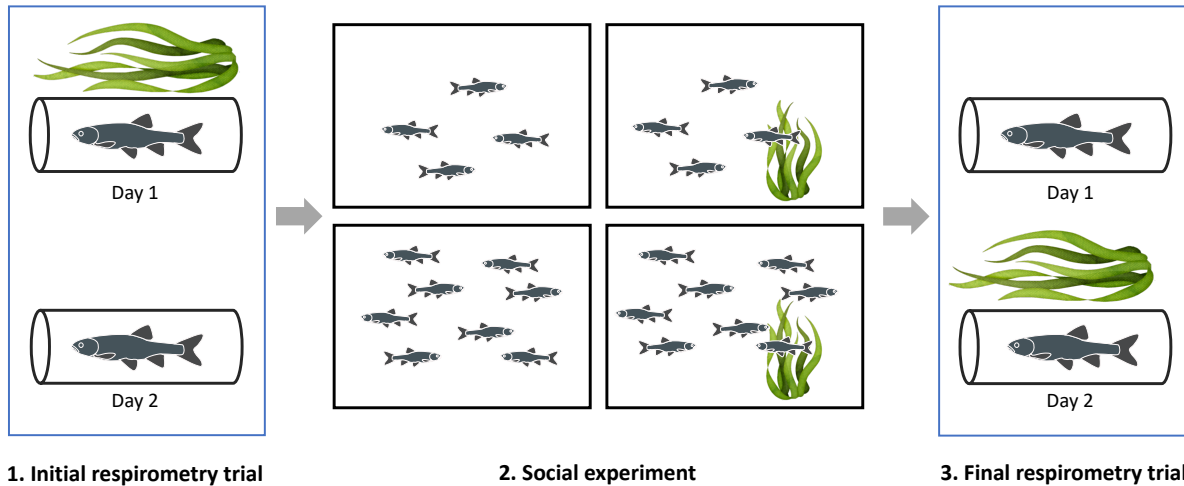

599  
600 Figure 1: Experimental design of the study. Each experiment consisted of an initial respirometry  
601 trial, a 3-week holding in a social treatment, and a final respirometry trial. 1. Initial respirometry  
602 trial: Fish oxygen uptake was measured for ~45h during which chambers were covered with  
603 artificial plant shelter for approximately half of the trial duration. 2. Social experiment: After the  
604 initial respirometry trial, fish were allotted in groups of four or eight fish and placed in  
605 experimental tanks containing artificial plant shelter or not, thus forming different social  
606 treatments. Fish stayed in their social treatment for 3 weeks. 3. Final respirometry trial: After the  
607 social treatment, fish oxygen uptake was measured again by respirometry, in chambers covered  
608 with artificial plant shelter for half of the trial duration. Each experiment involved 16 fish  
609 (maximum capacity of the respirometry set-up), thus this process was repeated five times, for a  
610 total of 80 fish.

611

612

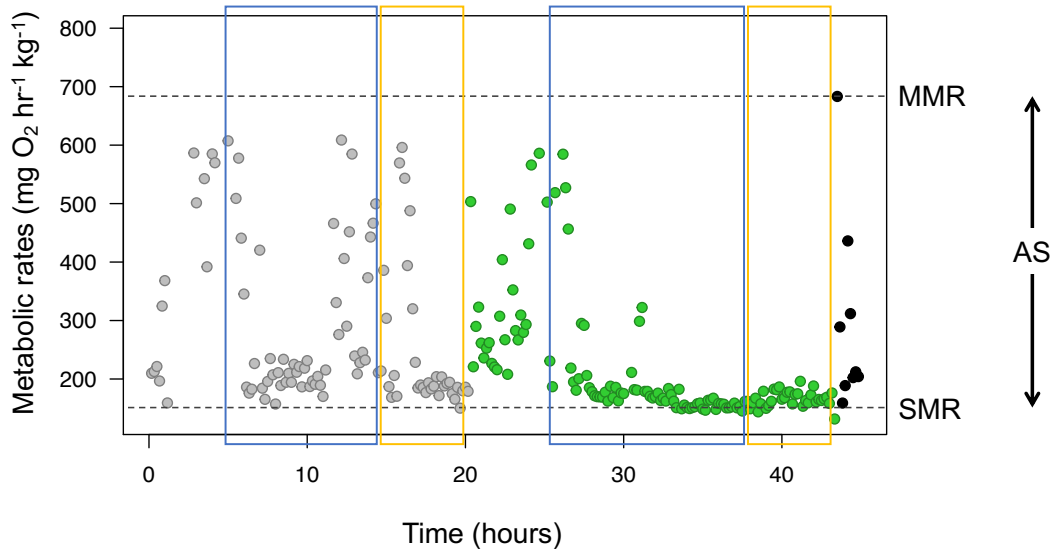

613

614 Figure 2: Experimental protocol to obtain  $\dot{M}O_2$  data for the Eurasian minnow. The example

615 shows a 48-h long respirometry trial which started with the condition “without plant” (grey

616 points). The condition was changed to “with plant” (green points) the next day at around noon.

617 On the last day at noon, fish was removed from the respirometry chamber, chased, and

618 immediately placed back into the chamber to obtain MMR (black points). Blue and yellow

619 rectangles represent the range of data used for estimation of night-time and day-time minimum

620  $\dot{M}O_2$ , respectively, with or without plant cover. Top and bottom horizontal dotted lines show

621 MMR and SMR.

622

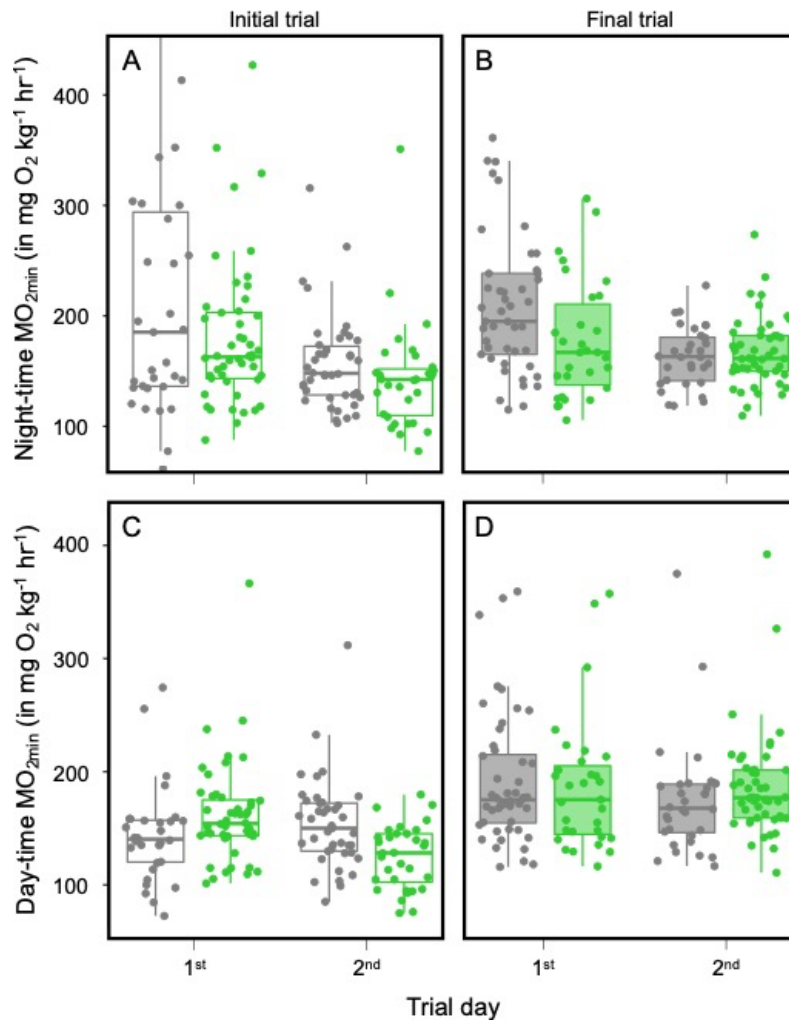

623  
 624 Figure 3: Observed night-time (A, B) and day-time (C, D) metabolic rates in initial (clear) and  
 625 final (shaded) respirometry trials. Grey and green dots represent estimates in absence or in  
 626 presence of plant shelter, respectively. Middle thick line of the boxplots corresponds to the  
 627 median, lower and upper limits correspond to the first and third quartiles of the data, and  
 628 whiskers extend to the range of the data.  
 629

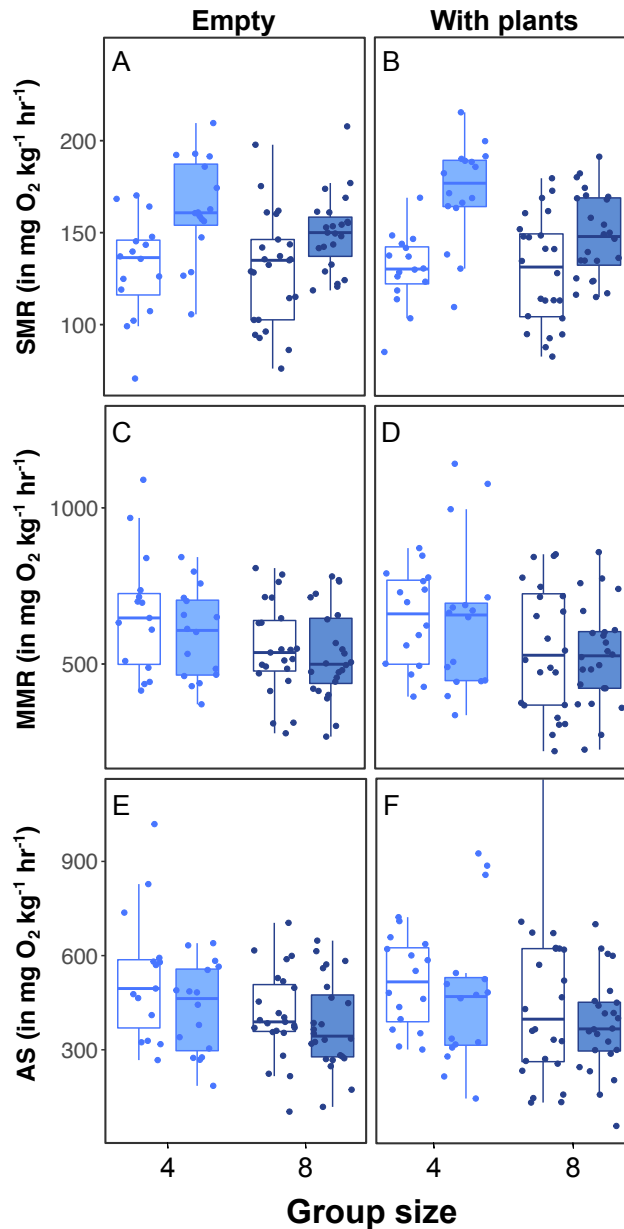

630  
 631 Figure 4: Observed SMR (A-B), MMR (C-D), and AS (E-F) of Eurasian minnow. Light blue and  
 632 dark blue boxes and points represent estimates for fish held in groups of four and eight,  
 633 respectively. Clear and shaded boxes represent initial and final respirometry trials, respectively.  
 634 A-C-E panels refer to tanks without plant shelter, and B-D-F refer to tanks containing plant  
 635 shelter. Middle thick line of the boxplots corresponds to the median, lower and upper limits  
 636 correspond to the first and third quartiles of the data, and whiskers extend to the range of the data.
